# Supplementary material for: Preparation and Characterization of Model Tire–Road Wear Particles
Source: MDPI journal article supplement (doi:10.3390/polym14081512), 2022-04-08
Supplement: s1 [file s1]

## Preparation and characterization of model tire-road wear particles

### Supplementary Information

**Table S1.** Formulation of the model TWP (phr).

| Component      | Content (phr) |
|----------------|---------------|
| NR             | 100           |
| Carbon black   | 55            |
| Curatives      | 9.7           |
| Antidegradants | 4             |
| Processing oil | 5             |

**Table S2.** EDS analysis results of the real MPs of 212- 500  $\mu\text{m}$  (rMP1, rMP2, and rMP3) and the chloroform-treated TRWPs of 212- 500  $\mu\text{m}$  (rTRWP1 and rTRWP2) collected on the road.

| Element | Content (wt%) |      |      |        |        |
|---------|---------------|------|------|--------|--------|
|         | rMP1          | rMP1 | rMP1 | rTRWP1 | rTRWP2 |
| C       | 14.6          | 18.8 | 24.4 | 52.0   | 57.0   |
| O       | 52.6          | 48.1 | 53.1 | 36.6   | 34.4   |
| Na      | 0.4           | 5.9  | ---  | ---    | 0.3    |
| Mg      | ---           | 1.4  | 0.7  | 0.3    | ---    |
| Al      | 6.7           | 0.8  | 3.8  | 1.5    | 0.6    |
| Si      | 18.6          | 20.6 | 12.7 | 4.3    | 5.2    |
| S       | ---           | ---  | ---  | 0.5    | 0.6    |
| K       | 6.6           | ---  | 1.2  | 0.5    | 0.2    |
| Ca      | ---           | 4.0  | 0.6  | 1.7    | 0.7    |
| Fe      |               |      |      | 1.6    | 0.6    |
| Zn      |               |      |      | 0.8    | 0.3    |

**Table S3.** EDS analysis results of the model asphalt pavement wear particles (APP1 and APP2), the model concrete pavement wear particles (CPP1 and CPP2), and the model stone wear particles (SP1 and SP2) of 20 - 38  $\mu\text{m}$ .

| Element | Content (wt%) |      |      |      |      |      |
|---------|---------------|------|------|------|------|------|
|         | APP1          | APP2 | CPP1 | CPP2 | SP1  | SP2  |
| C       | 45.5          | 32.1 | 15.5 | 11.2 | 11.4 | 9.3  |
| O       | 40.6          | 46.1 | 53.0 | 50.8 | 48.7 | 52.8 |
| Na      | ---           | ---  | ---  | ---  | ---  | 1.9  |
| Mg      | 0.2           | 0.2  | 7.8  | 1.9  | 13.8 | 3.1  |
| Al      | 0.8           | 0.6  | 0.5  | 1.5  | 11.1 | 6.6  |
| Si      | 3.1           | 2.4  | 1.3  | 6.5  | 9.8  | 13.9 |
| S       | ---           | ---  | ---  | ---  | ---  | 1.6  |
| K       | 0.4           | ---  | ---  | ---  | 1.6  | 2.9  |
| Ca      | 9.5           | 18.5 | 21.4 | 25.3 | 3.6  | 3.0  |
| Ti      | ---           | ---  |      |      | ---  | 0.5  |
| Fe      | ---           | ---  | 0.5  | 1.3  | ---  | 5.9  |

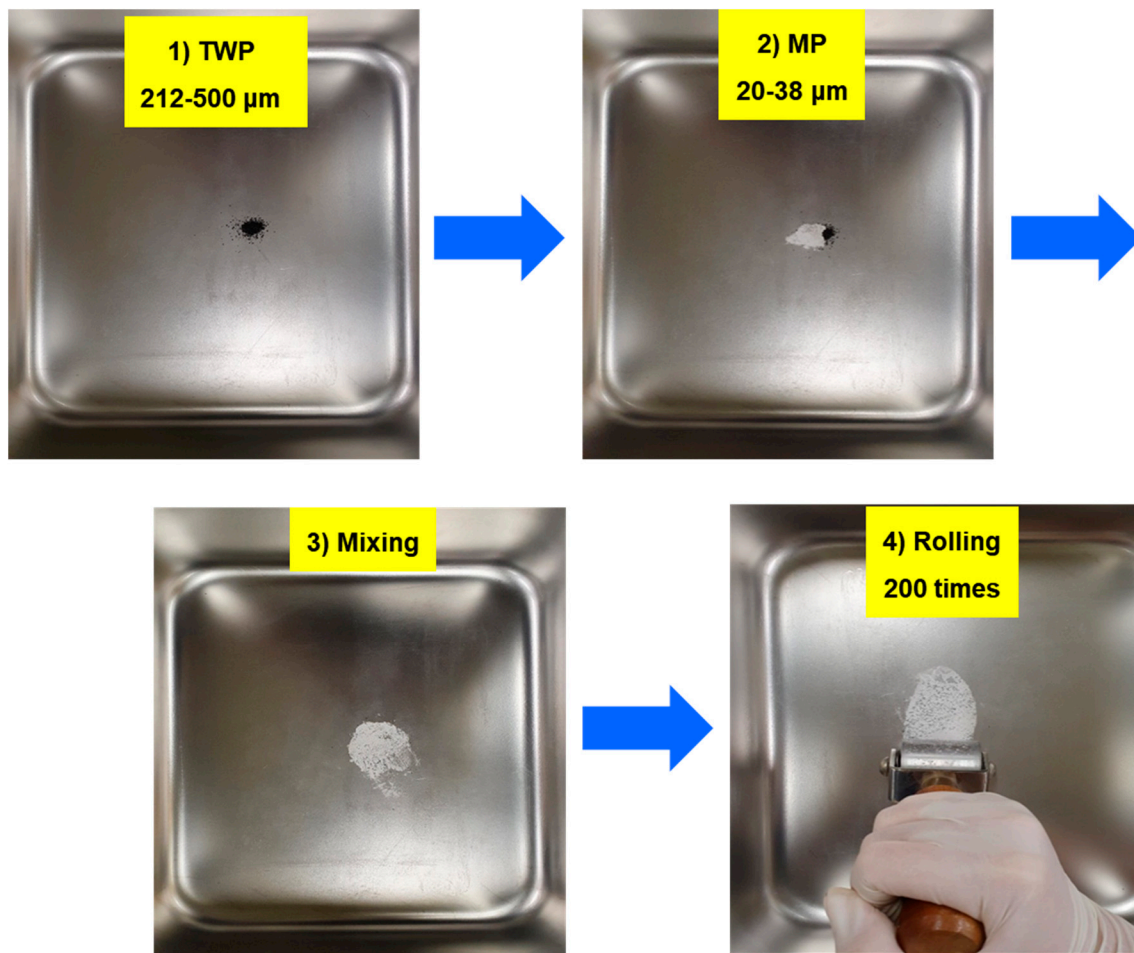

**Figure S1.** Preparation procedure of model TRWP.



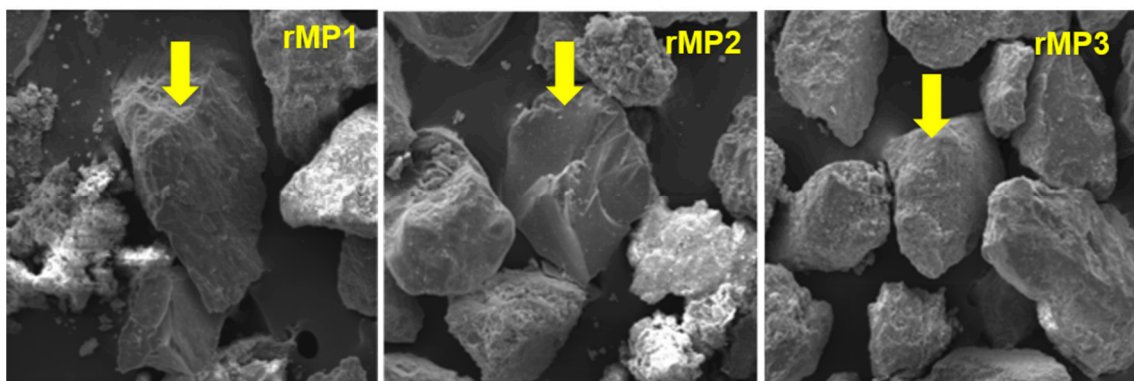

**Figure S2.** SEM images of the real MPs of 212 – 500  $\mu\text{m}$  collected at the bus stop.

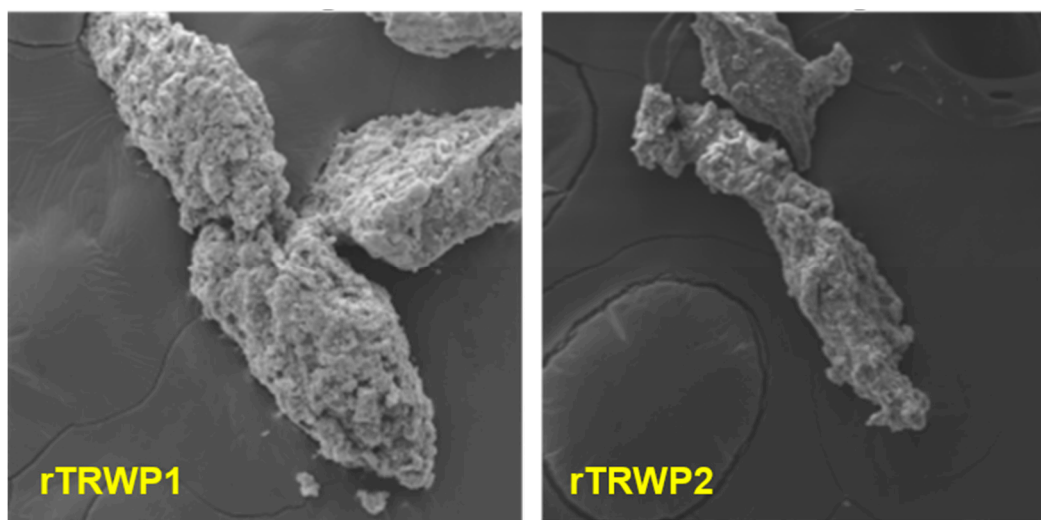

**Figure S3.** SEM images of the chloroform-treated real TRWPs of 212 – 500  $\mu\text{m}$  collected at a bus stop.

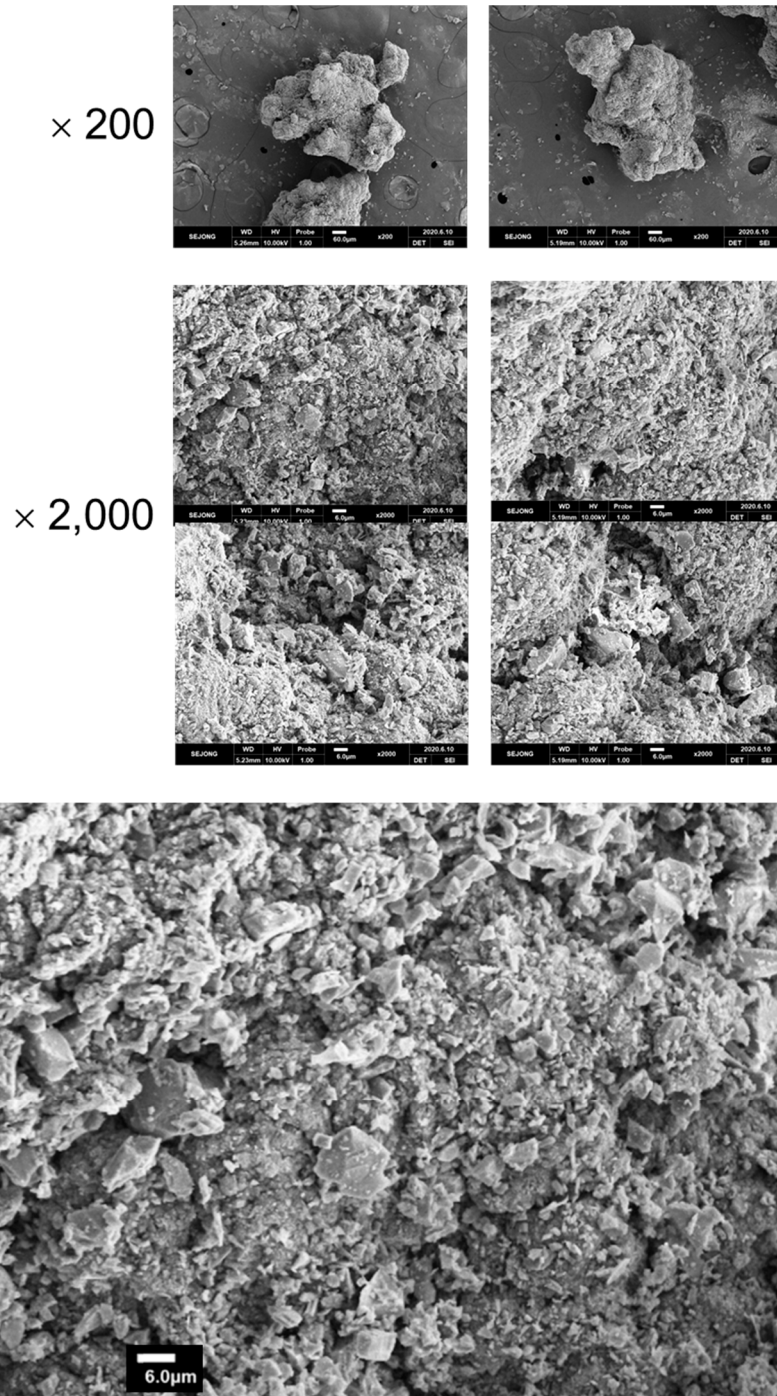

**Figure S4.** SEM images of the model TRWPs made of TWPs without treatment by the single step pressing procedure.

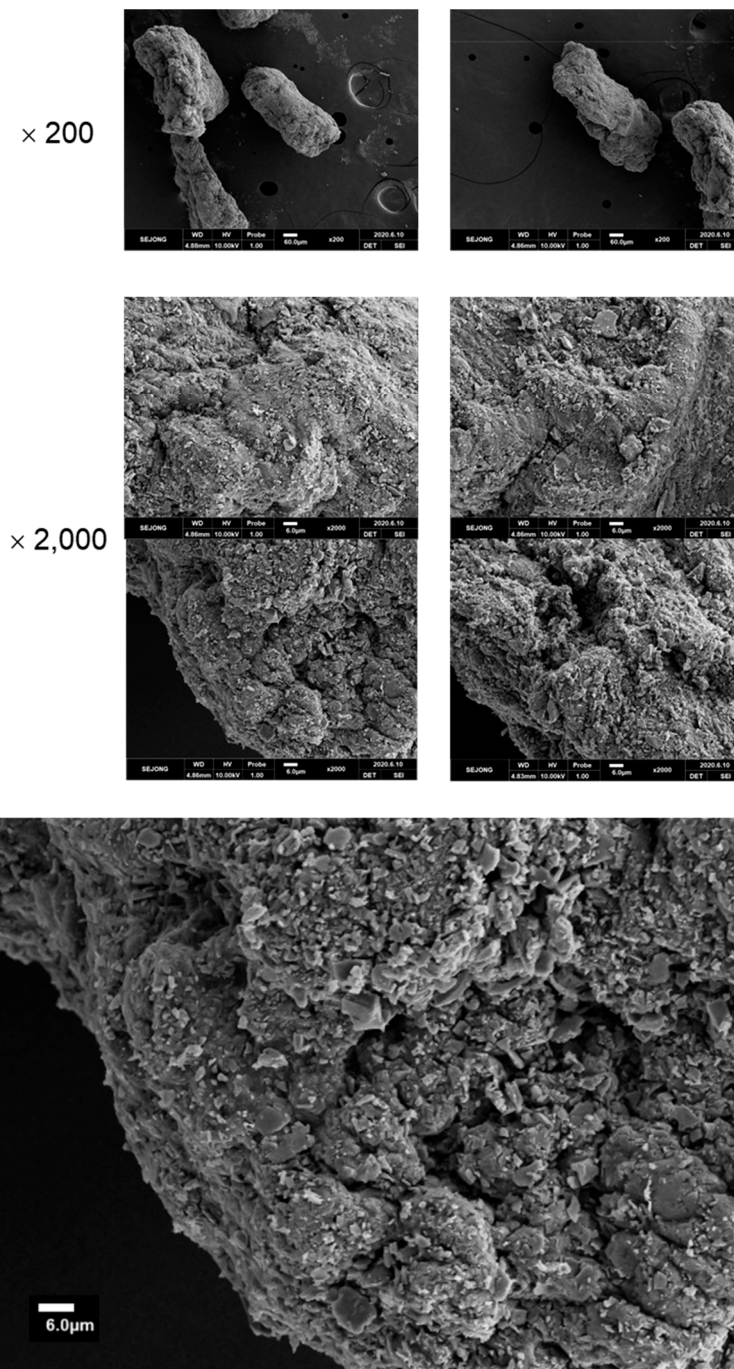

**Figure S5.** SEM images of the model TRWPs made of TWPs without treatment by the double step pressing procedure.

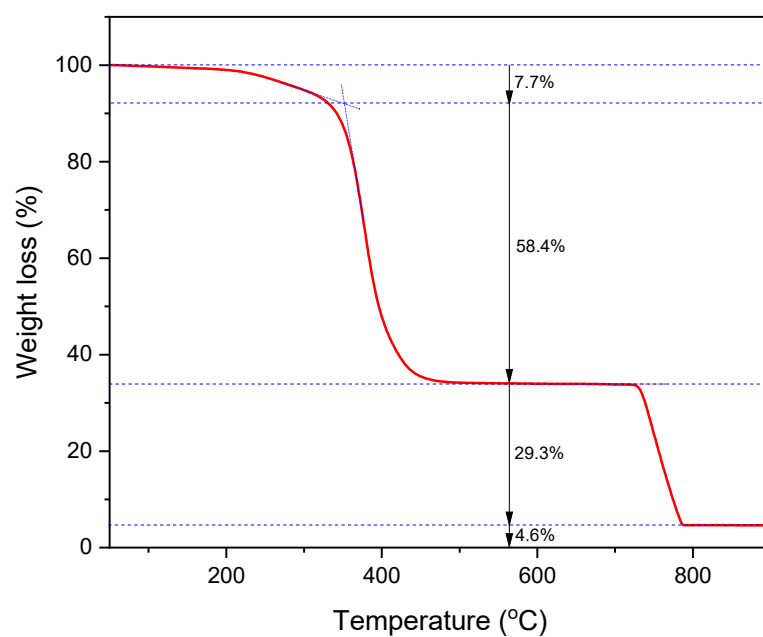

**Figure S6.** TGA thermogram of the model TWP.

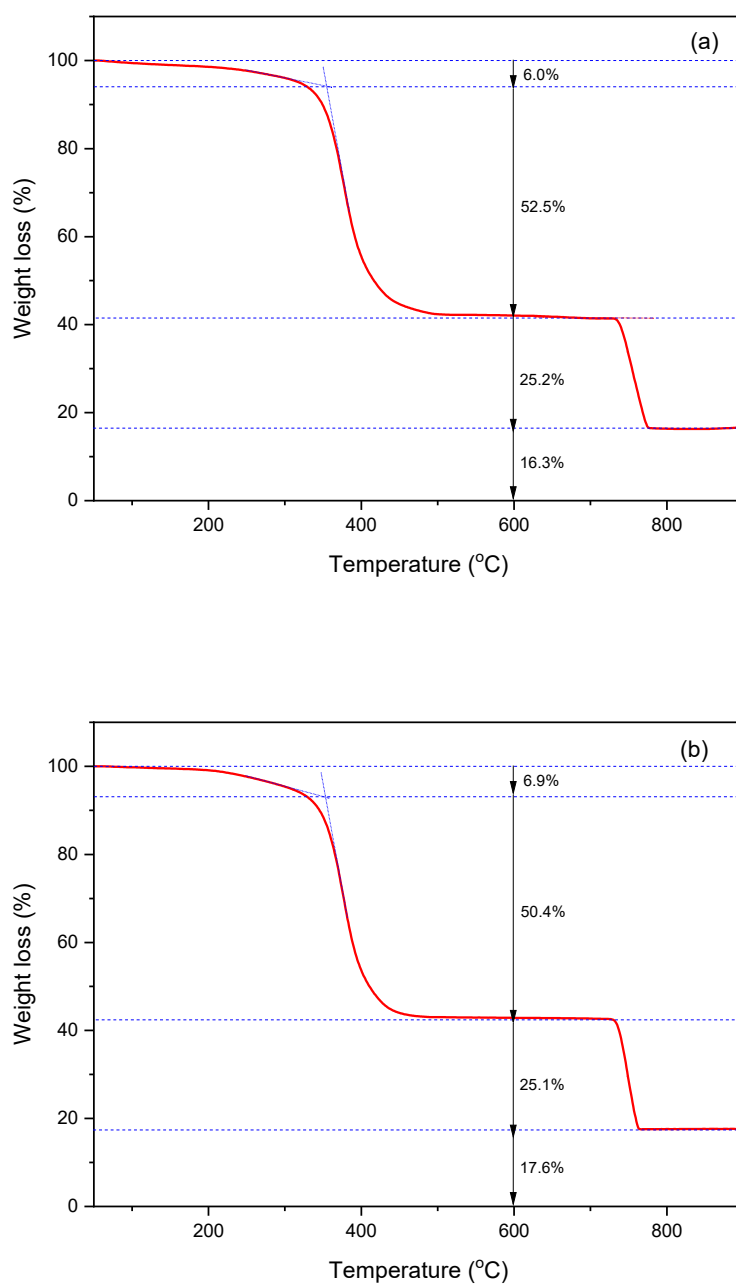

**Figure S7.** TGA thermograms of the model TRWPs made of TWPs without treatment by the single (a) and double (b) step pressing procedures.

Untreated TWPs

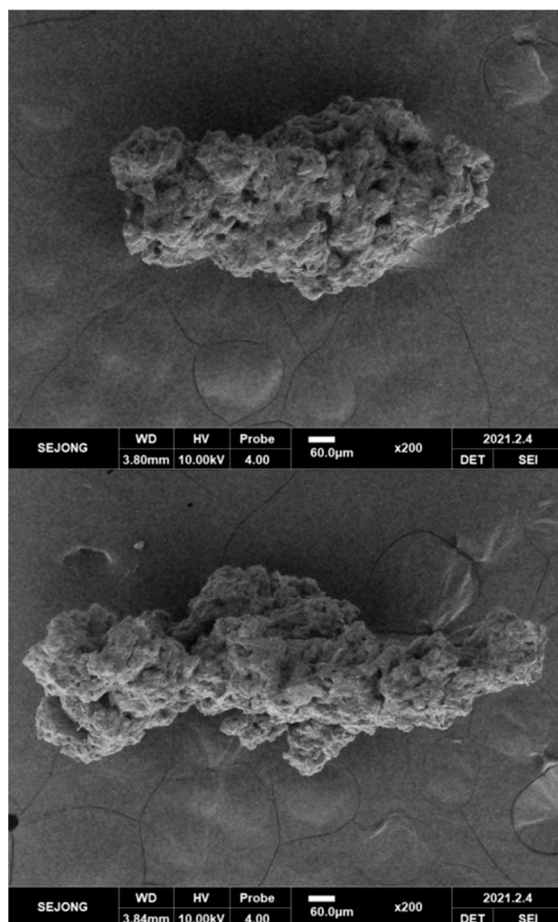

Chloroform-treated TWPs

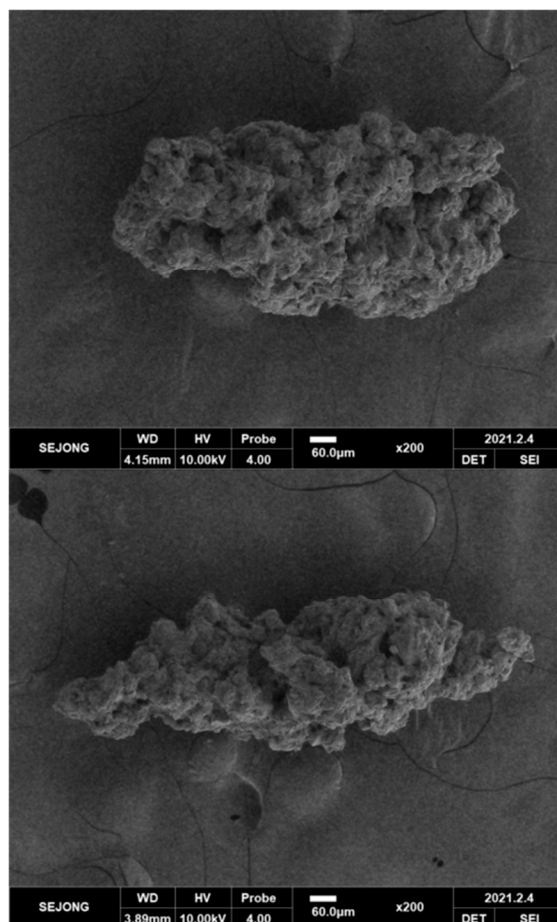

Figure S8. SEM images of the untreated and chloroform-treated TWPs.

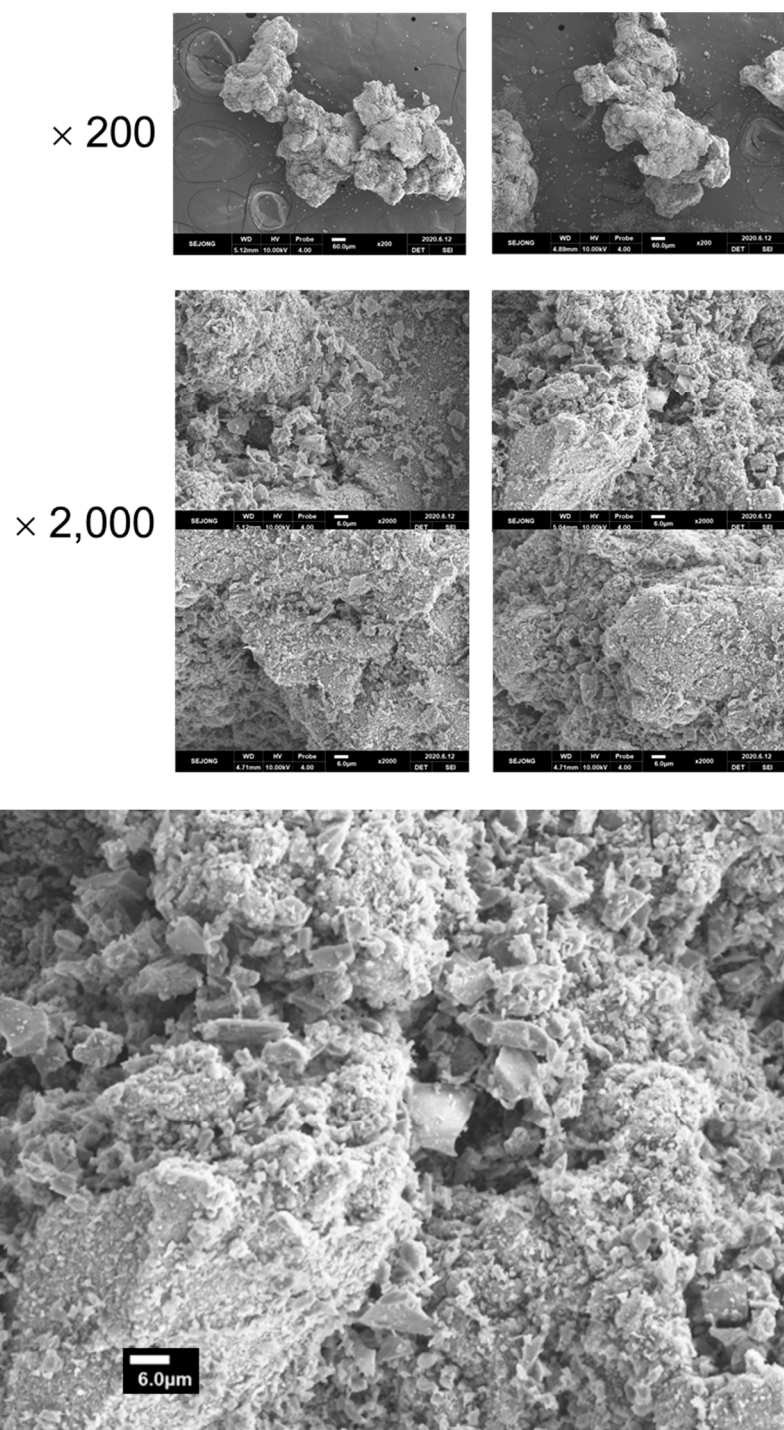

**Figure S9.** SEM images of the model TRWPs made of the chloroform-treated TWPs by the single step pressing procedure.



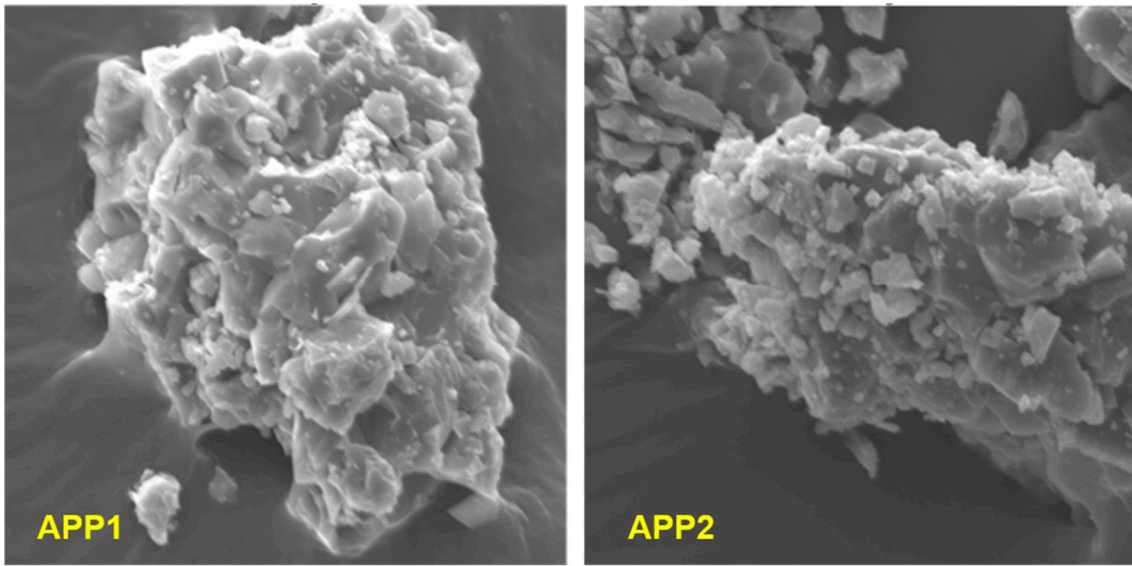

**Figure S10.** SEM images of the model asphalt pavement wear particles of 20 - 38  $\mu\text{m}$ .

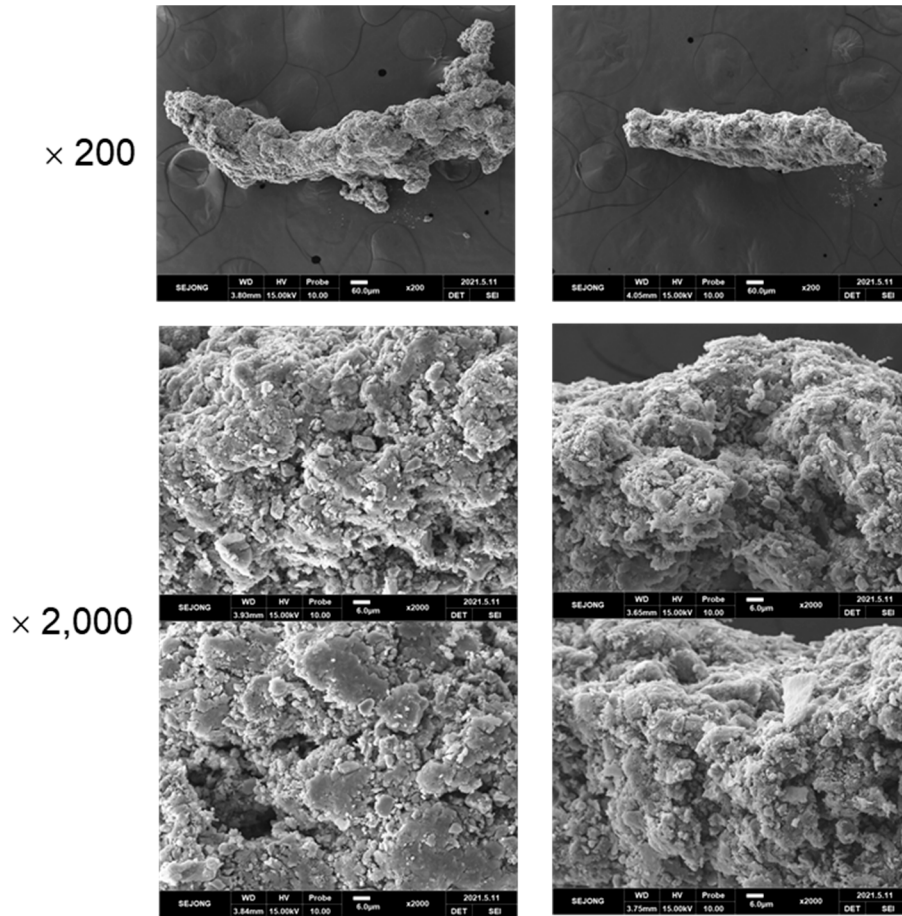

**Figure S11.** SEM images of the model TRWPs made of the untreated TWPs (212 - 500  $\mu\text{m}$ ) and the asphalt pavement wear particles (20 - 38  $\mu\text{m}$ ).

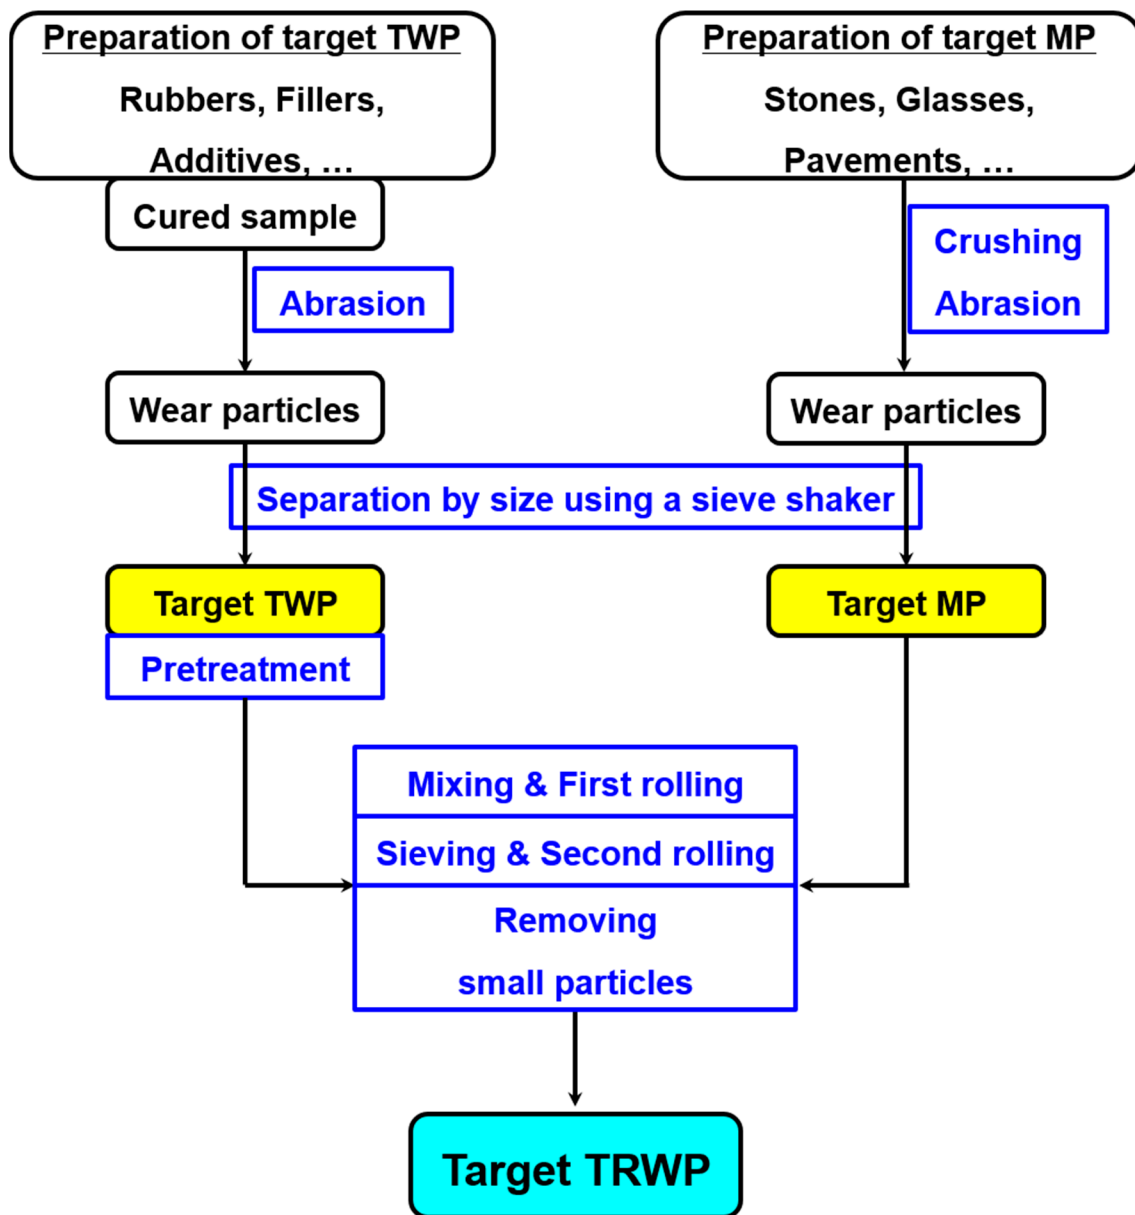

**Figure S12.** Preparation process of tailor-made TRWPs.

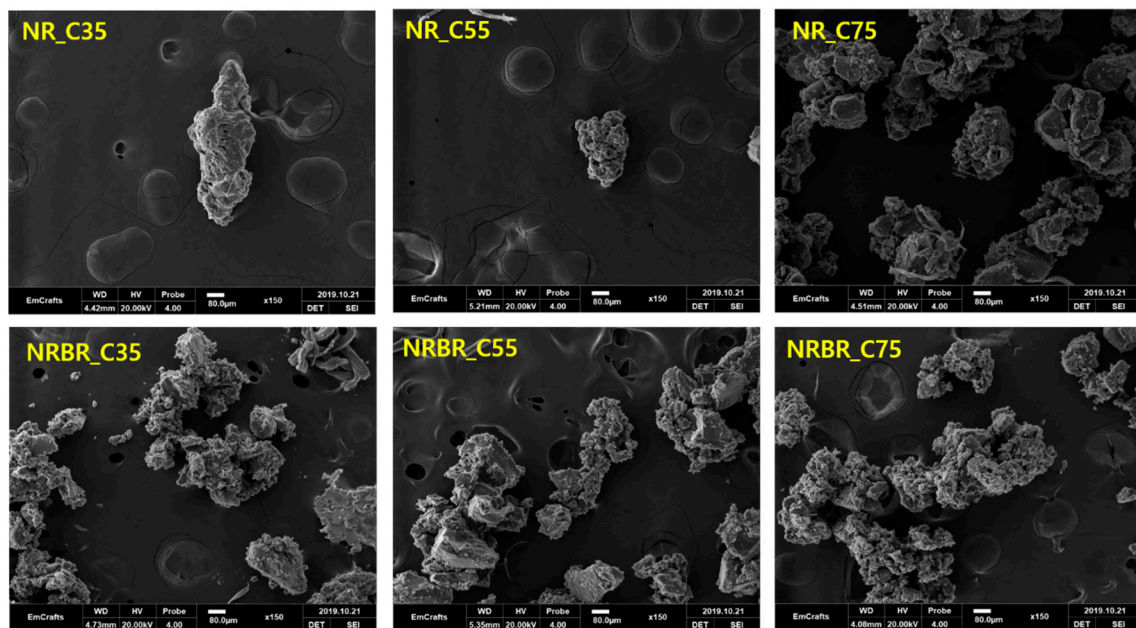

**Figure S13.** SEM images of various TWPs made by cryogenic crushing. The NR\_C35, NR\_C55, and NR\_C75 samples are NR = 100 vulcanizates with carbon black contents of 35, 55, and 75 phr, respectively. The NRBR\_C35, NRBR\_C55, and NRBR\_C75 samples are NR/BR = 80/20 vulcanizates with carbon black contents of 35, 55, and 75 phr, respectively.

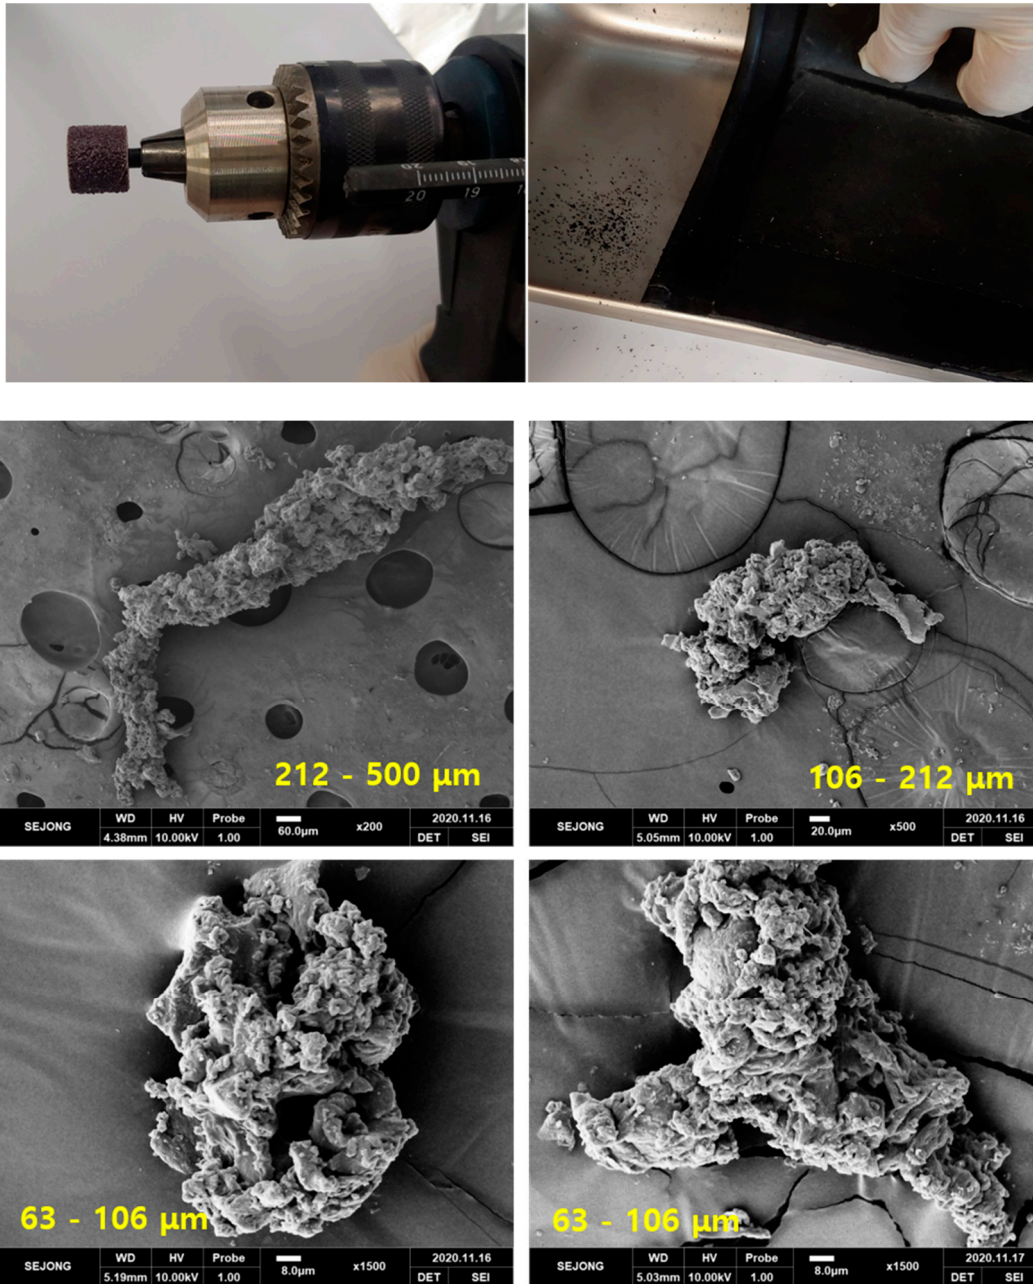

**Figure S14.** Photographs of preparation of TWPs using a hand drill and a tensile test specimen, and SEM images of the various SBR TWPs made using the hand drill method.



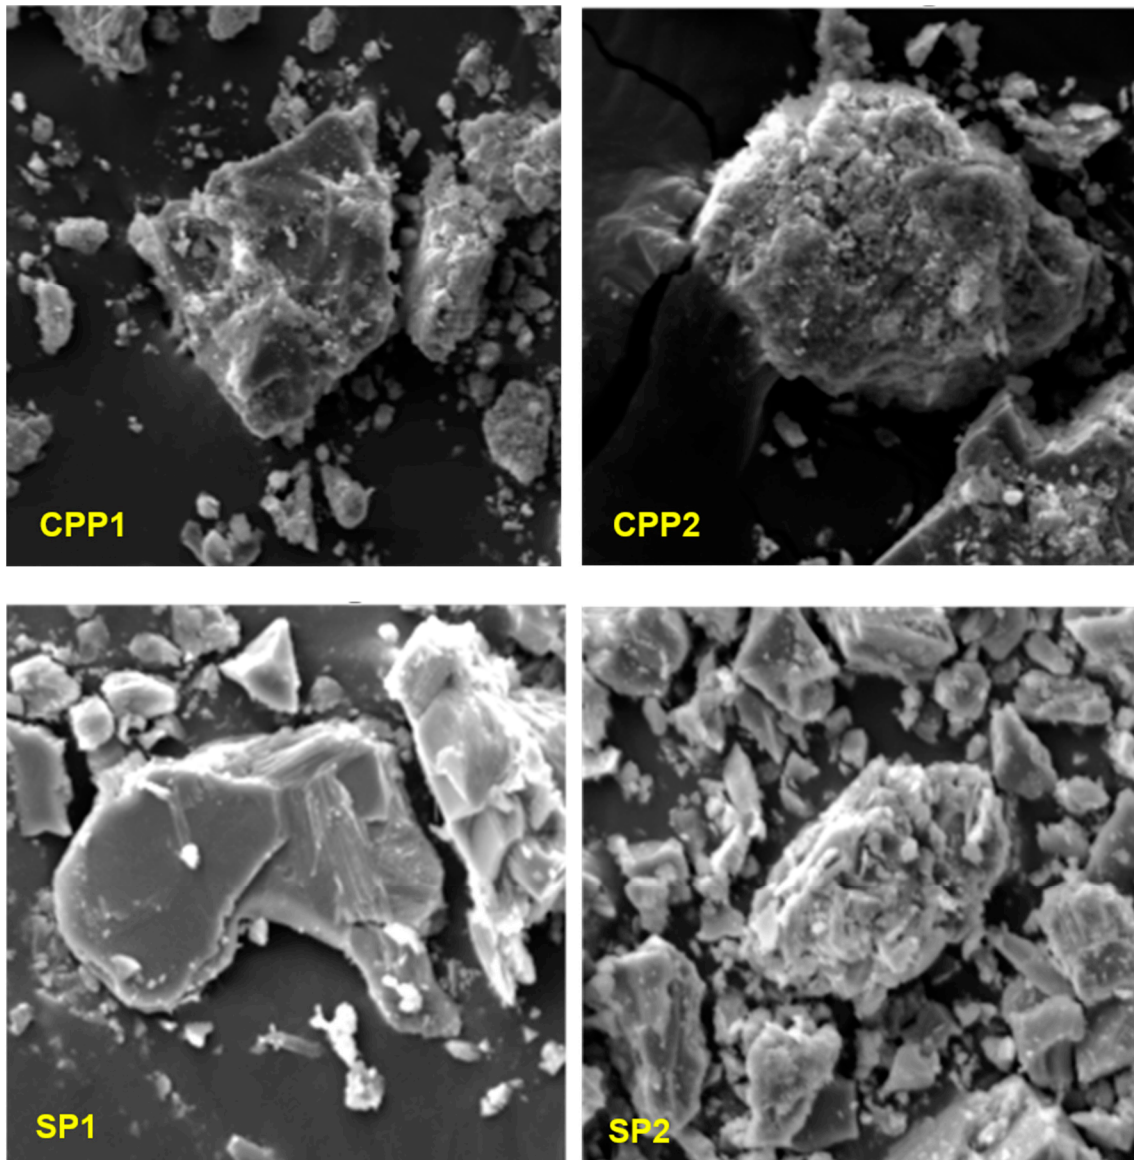

**Figure S15.** SEM images of the model concrete pavement (CPP1 and CPP2) and stone (SP1 and SP2) wear particles of 20 - 38  $\mu\text{m}$ .
